# Supplementary material for: Selection of Tropical Microalgae Species for Mass Production Based on Lipid and Fatty Acid Profiles
Source: Frontiers journal article supplement (doi:10.3389/fenrg.2022.912904), 2022-06-28
Supplement: Table_1.pdf [file Table_1.pdf]

**Supplementary File 1: Bold's Basal Medium (BBM) Recipe (Bischoff & Bold 1963)****a. Composition of BBM medium in 1000 ml**

| Quantity            | Component                     | Stock Solution     |
|---------------------|-------------------------------|--------------------|
| 10 ml               | Macronutrients                | (see recipe below) |
| 1 ml                | Alkaline EDTA stock solution  | (see recipe below) |
| 1 ml                | Acidified iron stock solution | (see recipe below) |
| 1 ml                | Boron stock solution          | (see recipe below) |
| 1 ml                | Trace metals solution         | (see recipe below) |
| Bring up to 1000 ml | Distilled water               | -                  |

**b. Composition of macronutrients in 1000 ml**

| Component                            | Stock solution (g/L) | Quantity used       | Concentration in final medium (M) |
|--------------------------------------|----------------------|---------------------|-----------------------------------|
| NaNO <sub>3</sub>                    | 25.00                | 10 ml               | 2.94 x 10 <sup>-3</sup>           |
| CaCl <sub>2</sub> ·2H <sub>2</sub> O | 2.50                 | 10 ml               | 1.70 x 10 <sup>-4</sup>           |
| MgSO <sub>4</sub> ·7H <sub>2</sub> O | 7.50                 | 10 ml               | 3.04 x 10 <sup>-4</sup>           |
| K <sub>2</sub> HPO <sub>4</sub>      | 7.50                 | 10 ml               | 4.31 x 10 <sup>-4</sup>           |
| KH <sub>2</sub> PO <sub>4</sub>      | 17.50                | 10 ml               | 1.29 x 10 <sup>-3</sup>           |
| NaCl                                 | 2.50                 | 10 ml               | 4.28 x 10 <sup>-4</sup>           |
| Distilled water                      | -                    | Bring up to 1000 ml | -                                 |

**c. Composition of alkaline EDTA stock solution in 1000 ml**

| Component            | Stock solution (g/L) | Quantity used       | Concentration in final medium (M) |
|----------------------|----------------------|---------------------|-----------------------------------|
| EDTA·Na <sub>2</sub> | 50.00                | -                   | 1.71 x 10 <sup>-4</sup>           |
| KOH                  | 31.00                | -                   | 5.53 x 10 <sup>-4</sup>           |
| Distilled water      | -                    | Bring up to 1000 ml | -                                 |

**d. Composition of acidified iron stock solution in 1000 ml**

| Component                            | Stock solution (g/L) | Quantity used       | Concentration in final medium (M) |
|--------------------------------------|----------------------|---------------------|-----------------------------------|
| FeSO <sub>4</sub> ·7H <sub>2</sub> O | 4.98                 | -                   | 1.79 x 10 <sup>-5</sup>           |
| H <sub>2</sub> SO <sub>4</sub>       | -                    | 1 ml                | -                                 |
| Distilled water                      | -                    | Bring up to 1000 ml | -                                 |

**e. Composition of boron stock solution in 1000 ml**

| Component                      | Stock solution (g/L) | Quantity used       | Concentration in final medium (M) |
|--------------------------------|----------------------|---------------------|-----------------------------------|
| H <sub>3</sub> BO <sub>3</sub> | 11.42                | -                   | 1.85 x 10 <sup>-4</sup>           |
| Distilled water                | -                    | Bring up to 1000 ml | -                                 |

**f. Composition of trace metals solution in 1000 ml**

| Component                                            | Stock solution (g/L) | Quantity used       | Concentration in final medium (M) |
|------------------------------------------------------|----------------------|---------------------|-----------------------------------|
| ZnSO <sub>4</sub> ·7H <sub>2</sub> O                 | 8.82                 | -                   | 3.07 x 10 <sup>-5</sup>           |
| MnCl <sub>2</sub> ·4H <sub>2</sub> O                 | 1.44                 | -                   | 7.28 x 10 <sup>-6</sup>           |
| MoO <sub>3</sub>                                     | 0.71                 | -                   | 4.93 x 10 <sup>-6</sup>           |
| CuSO <sub>4</sub> ·5H <sub>2</sub> O                 | 1.57                 | -                   | 6.29 x 10 <sup>-6</sup>           |
| Co(NO <sub>3</sub> ) <sub>2</sub> ·6H <sub>2</sub> O | 0.49                 | -                   | 1.68 x 10 <sup>-6</sup>           |
| Distilled water                                      | -                    | Bring up to 1000 ml | -                                 |
