# Supplementary material for: Selection of Tropical Microalgae Species for Mass Production Based on Lipid and Fatty Acid Profiles
Source: Frontiers journal article supplement (doi:10.3389/fenrg.2022.912904), 2022-06-28
Supplement: Table_2.pdf [file Table_2.pdf]

**Supplementary File 2: Walne's Medium Recipe (Walne, 1970)****a. Composition of Walne's medium in 1000 ml**

| Quantity            | Component               | Stock Solution     |
|---------------------|-------------------------|--------------------|
| 1 ml                | Nutrient stock solution | (see recipe below) |
| 0.1 ml              | Vitamin stock solution  | (see recipe below) |
| Bring up to 1000 ml | Filtered seawater       | -                  |

**b. Composition of nutrient stock solution in 1000 ml**

| Component                                           | Quantity used       | Concentration in final medium (M) |
|-----------------------------------------------------|---------------------|-----------------------------------|
| NaNO <sub>3</sub>                                   | 100.00 g            | $1.18 \times 10^{-3}$             |
| H <sub>3</sub> BO <sub>3</sub>                      | 33.60 g             | $5.43 \times 10^{-4}$             |
| EDTA                                                | 45.00 g             | $1.54 \times 10^{-4}$             |
| NaH <sub>2</sub> PO <sub>4</sub> ·2H <sub>2</sub> O | 20.00 g             | $1.28 \times 10^{-4}$             |
| FeCl <sub>3</sub> ·6H <sub>2</sub> O                | 1.30 g              | $4.81 \times 10^{-6}$             |
| MnCl <sub>2</sub> ·4H <sub>2</sub> O                | 0.36 g              | $1.82 \times 10^{-6}$             |
| Trace metals solution                               | 1 ml                | (see recipe below)                |
| Distilled water                                     | Bring up to 1000 ml | -                                 |

**c. Composition of trace metals solution in 100 ml**

| Component                                                                          | Quantity used      | Concentration in final medium (M) |
|------------------------------------------------------------------------------------|--------------------|-----------------------------------|
| ZnCl <sub>2</sub>                                                                  | 21.00 g            | $1.54 \times 10^{-7}$             |
| CoCl <sub>2</sub> ·6H <sub>2</sub> O                                               | 20.00 g            | $8.41 \times 10^{-8}$             |
| (NH <sub>4</sub> ) <sub>6</sub> Mo <sub>7</sub> O <sub>24</sub> ·4H <sub>2</sub> O | 9.00 g             | $7.28 \times 10^{-9}$             |
| CuSO <sub>4</sub> ·5H <sub>2</sub> O                                               | 20.00 g            | $8.01 \times 10^{-8}$             |
| Distilled water                                                                    | Bring up to 100 ml | -                                 |

**d. Composition of vitamin stock solution in 100 ml**

| Component                              | Quantity used      | Concentration in final medium (M) |
|----------------------------------------|--------------------|-----------------------------------|
| Thiamine.HCl (Vitamin B <sub>1</sub> ) | 1.00 g             | $2.96 \times 10^{-10}$            |
| Cyanocobalamin (B <sub>12</sub> )      | 50.00 mg           | $3.69 \times 10^{-8}$             |
| Distilled water                        | Bring up to 100 ml | -                                 |
